# Supplementary material
Source: PubMed Central journal article supplement (PMC5992044)

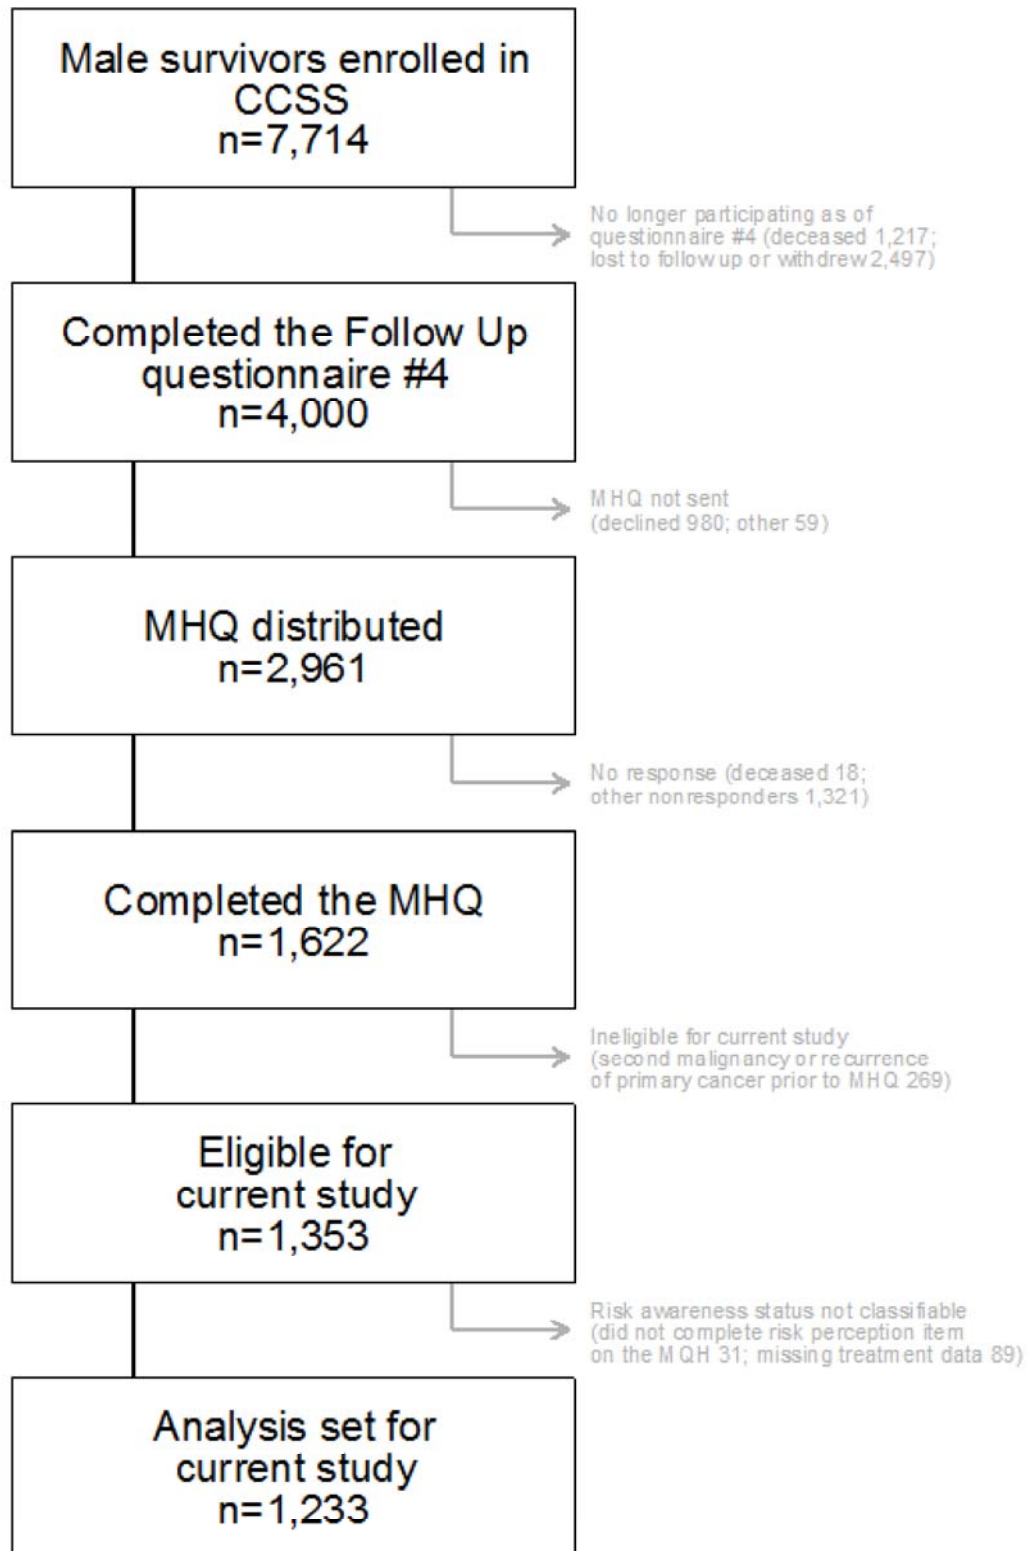

Supplement: NIHMS948383-supplement-Supp_figS1.pdf [file NIHMS948383-supplement-Supp_figS1.pdf]
